# Supplementary material
Source: PubMed Central journal article supplement (PMC3050997)
Supplement: NIHMS273374-supplement-01.pdf [file NIHMS273374-supplement-01.pdf]

Supple. Table 1: Melanoma cell line characteristics

|     | Cell Line  | SF2   | Mutation     | Source                   | Base Media <sup>a</sup> |
|-----|------------|-------|--------------|--------------------------|-------------------------|
| 1.  | SKMel-27   | 1.002 | B-Raf(V600E) | A.Houghton <sup>1</sup>  | RPMI 1640               |
| 2.  | SKMel-187  | 0.807 | WT           | A.Houghton <sup>1</sup>  | DMEM                    |
| 3.  | SK-Mel-23  | 0.796 | B-Raf(G466A) | A.Houghton <sup>1</sup>  | DMEM                    |
| 4.  | SKMel-131  | 0.783 | WT           | A.Houghton <sup>1</sup>  | RPMI 1640               |
| 5.  | RPMi-7951  | 0.763 | B-Raf(V600E) | UNC-TCF <sup>2</sup>     | MEM, 1X AA <sup>b</sup> |
| 6.  | SKMel-181  | 0.726 | B-Raf(V600E) | A.Houghton <sup>1</sup>  | RPMI 1640               |
| 7.  | SK-Mel-28  | 0.723 | B-Raf(V600E) | ATCC                     | MEM, 1X AA <sup>b</sup> |
| 8.  | WM1361A    | 0.719 | N-Ras(Q61R)  | M. Herlyn <sup>6</sup>   | Tu 2%                   |
| 9.  | WM35       | 0.708 | B-Raf(V600E) | ATCC                     | Tu 2%                   |
| 10. | VMM39      | 0.706 | N-Ras(Q61R)  | C.Slingluff <sup>3</sup> | DMEM                    |
| 11. | SKMel-115  | 0.686 | B-Raf(V600E) | A.Houghton <sup>1</sup>  | RPMI 1640               |
| 12. | SKMel-239  | 0.683 | B-Raf(V600E) | A.Houghton <sup>1</sup>  | RPMI 1640               |
| 13. | SK-Me-119  | 0.663 | N-Ras(Q61R)  | A.Houghton <sup>1</sup>  | RPMI 1640               |
| 14. | SK-Mel-130 | 0.647 | B-Raf(V600E) | A.Houghton <sup>1</sup>  | DMEM                    |
| 15. | SK-Mel-78  | 0.647 | WT           | J.Hansson <sup>4</sup>   | RPMI 1640               |
| 16. | RPMI 8322  | 0.613 | WT           | J.Arbiser <sup>5</sup>   | DMEM                    |
| 17. | A2058      | 0.606 | B-Raf(V600E) | J.Hansson <sup>4</sup>   | RPMI 1640               |
| 18. | Mel 505    | 0.574 | WT           | A.Houghton <sup>1</sup>  | RPMI 1640               |
| 19. | WM1158     | 0.525 | B-Raf(V600E) | M. Herlyn <sup>6</sup>   | Tu 2%                   |
| 20. | SKMel-100  | 0.523 | B-Raf(V600E) | A.Houghton <sup>1</sup>  | RPMI 1640               |
| 21. | UACC 257   | 0.502 | B-Raf(V600E) | M.Soengas <sup>8</sup>   | RPMI 1640               |
| 22. | SK-Mel-103 | 0.491 | N-Ras(Q61R)  | A.Houghton <sup>1</sup>  | DMEM                    |
| 23. | SKMel-186  | 0.460 | N-Ras(Q61R)  | A.Houghton <sup>1</sup>  | RPMI 1640               |
| 24. | Malme-3M   | 0.431 | B-Raf(V600E) | NCI-DCTD                 | RPMI 1640               |
| 25. | 1205 LU    | 0.405 | B-Raf(V600E) | M. Herlyn <sup>6</sup>   | Tu 2%                   |
| 26. | SKMel-190  | 0.394 | B-Raf(V600E) | A.Houghton <sup>1</sup>  | RPMI 1640               |
| 27. | Mel 537    | 0.376 | WT           | Lowy <sup>7</sup>        | RPMI 1640               |
| 28. | SBC12      | 0.370 | N-Ras(Q61R)  | M. Herlyn <sup>6</sup>   | DMEM                    |
| 29. | A375       | 0.367 | B-Raf(V600E) | J.Arbiser <sup>5</sup>   | DMEM                    |
| 30. | PMWK       | 0.319 | WT           | J.Arbiser <sup>5</sup>   | MEM, 1X AA <sup>b</sup> |
| 31. | Mel 224    | 0.229 | N-Ras(Q61R)  | J.Hansson <sup>4</sup>   | RPMI 1640               |
| 32. | SK-Mel-147 | 0.213 | N-Ras(Q61R)  | A.Houghton <sup>1</sup>  | DMEM                    |
| 33. | WM 2664    | 0.212 | B-Raf(V600D) | J.Arbiser <sup>5</sup>   | DMEM                    |
| 34. | SK-Mel-24  | 0.123 | B-Raf(V600E) | ATCC                     | MEM, 1X AA <sup>b</sup> |
| 35. | SKMel-5    | 0.078 | WT           | A.Houghton <sup>1</sup>  | RPMI 1640               |
| 36. | SKMel-153  | 0.055 | B-Raf(V600K) | A.Houghton <sup>1</sup>  | RPMI 1640               |
| 37. | SK-Mel-173 | 0.053 | N-Ras(Q61K)  | A.Houghton <sup>1</sup>  | DMEM                    |

<sup>1</sup>Alan Houghton (Memorial Sloan-Kettering Cancer Center)<sup>2</sup>University of North Carolina; Lineberger Comprehensive Cancer Center Tissue Culture Facility<sup>3</sup>Craig Slingluff (University of Virginia)<sup>4</sup>Johan Hansson (Karolinska Institutet)<sup>5</sup>Jack Arbiser (Emory University)<sup>6</sup>Meenhard Herlyn (The Wistar Institute)<sup>7</sup>Douglas Lowy (NCI)<sup>8</sup>Maria Soengas (Spanish National Cancer Research Centre)<sup>a</sup>Base media contain 10% FCS; cells were cultured at 5% CO<sub>2</sub><sup>b</sup>1.0X Non-essential Amino Acids (AA)

SF2 = Surviving Fraction at 2 Gy

WT = *B-Raf/N-Ras* wildtype
