# Supplementary material
Source: PubMed Central journal article supplement (PMC3050997)
Supplement: NIHMS273374-supplement-03.pdf [file NIHMS273374-supplement-03.pdf]

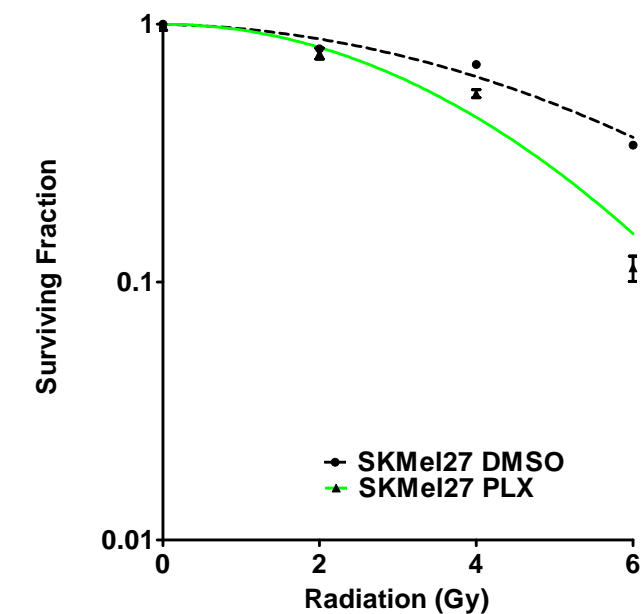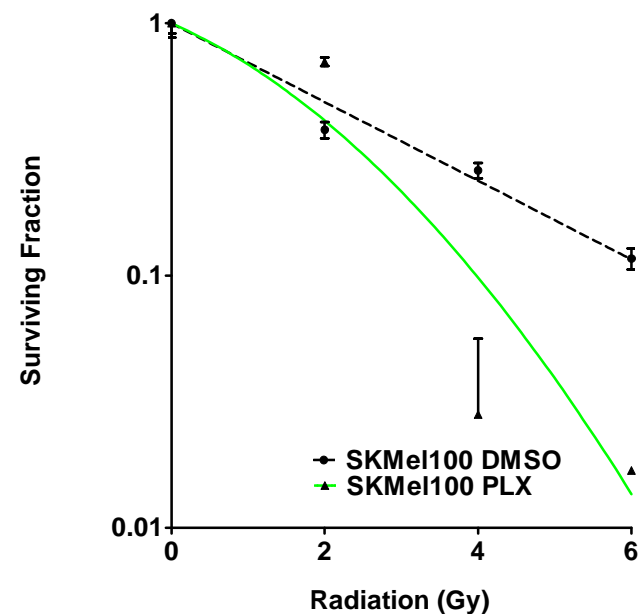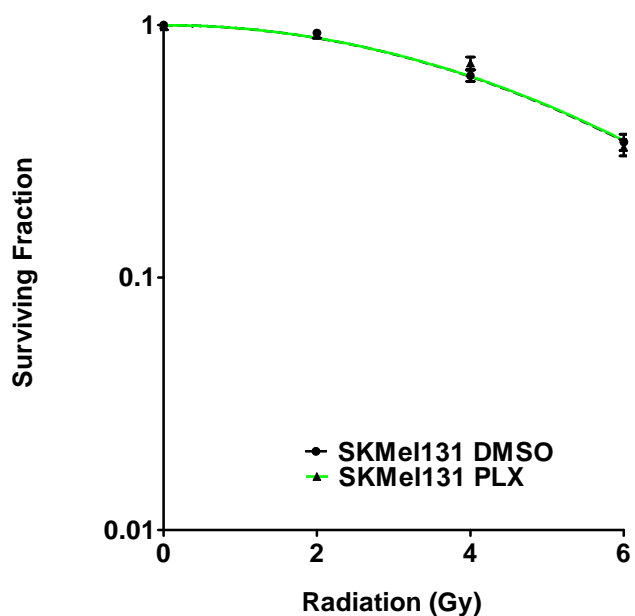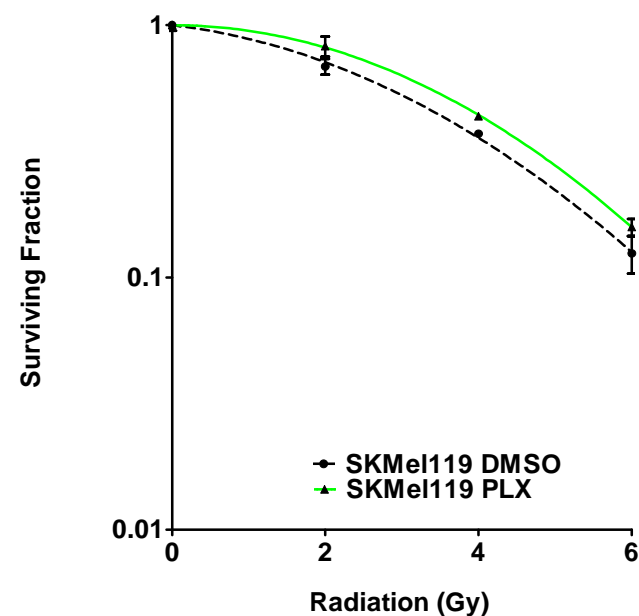

**Supple. Fig. 2: PLX-4032 radiosensitizes B-Raf+ melanoma cells.** B-Raf+ cells (SKMel27, SKMel100) were fed fresh media containing DMSO or PLX-4032 (1.0  $\mu$ M) for 48 h, irradiated at 0-6 Gy, trypsinized 2 hr post-irradiation and replated as single cells and colonies stained and counted after 2-3 weeks incubation. Surviving fractions were calculated by comparison to DMSO control cells. Control B-Raf/N-Ras WT (SKMel131) and N-Ras+ (SKMel119) cells were pretreated similarly with the highest dose of PLX-4032 (10.0  $\mu$ M).
