# Supplementary material
Source: PubMed Central journal article supplement (PMC3050997)
Supplement: NIHMS273374-supplement-04.pdf [file NIHMS273374-supplement-04.pdf]

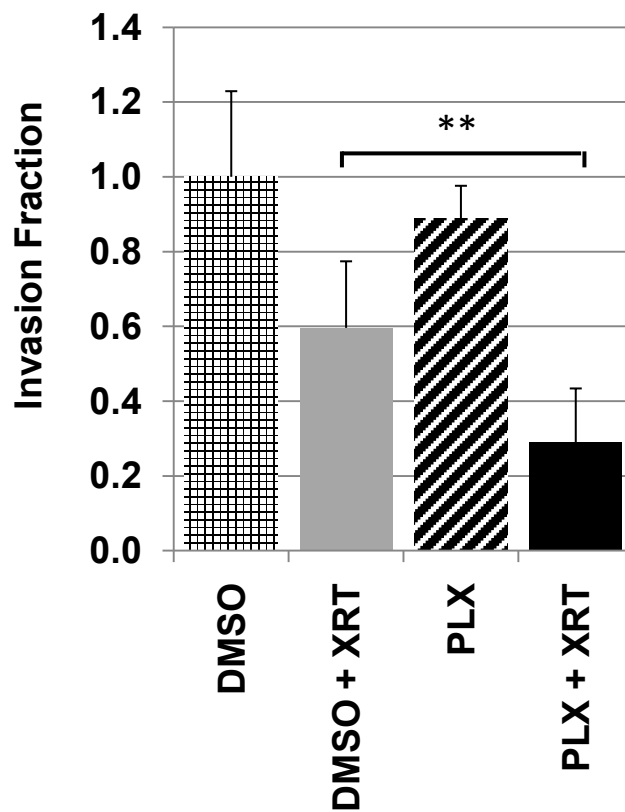

**Supple. Fig. 3: Inhibition of invasion of *B-Raf*<sup>+</sup> cells is enhanced by combination of PLX-4032 + radiation.** Spheroids were treated with PLX-4032 or DMSO for 2 h, irradiated at 5 Gy, embedded into a collagen matrix 2 hr post-irradiation without drug and invasion fractions calculated by comparison to DMSO control cells 3 d later.
