# Supplementary material
Source: PubMed Central journal article supplement (PMC3050997)

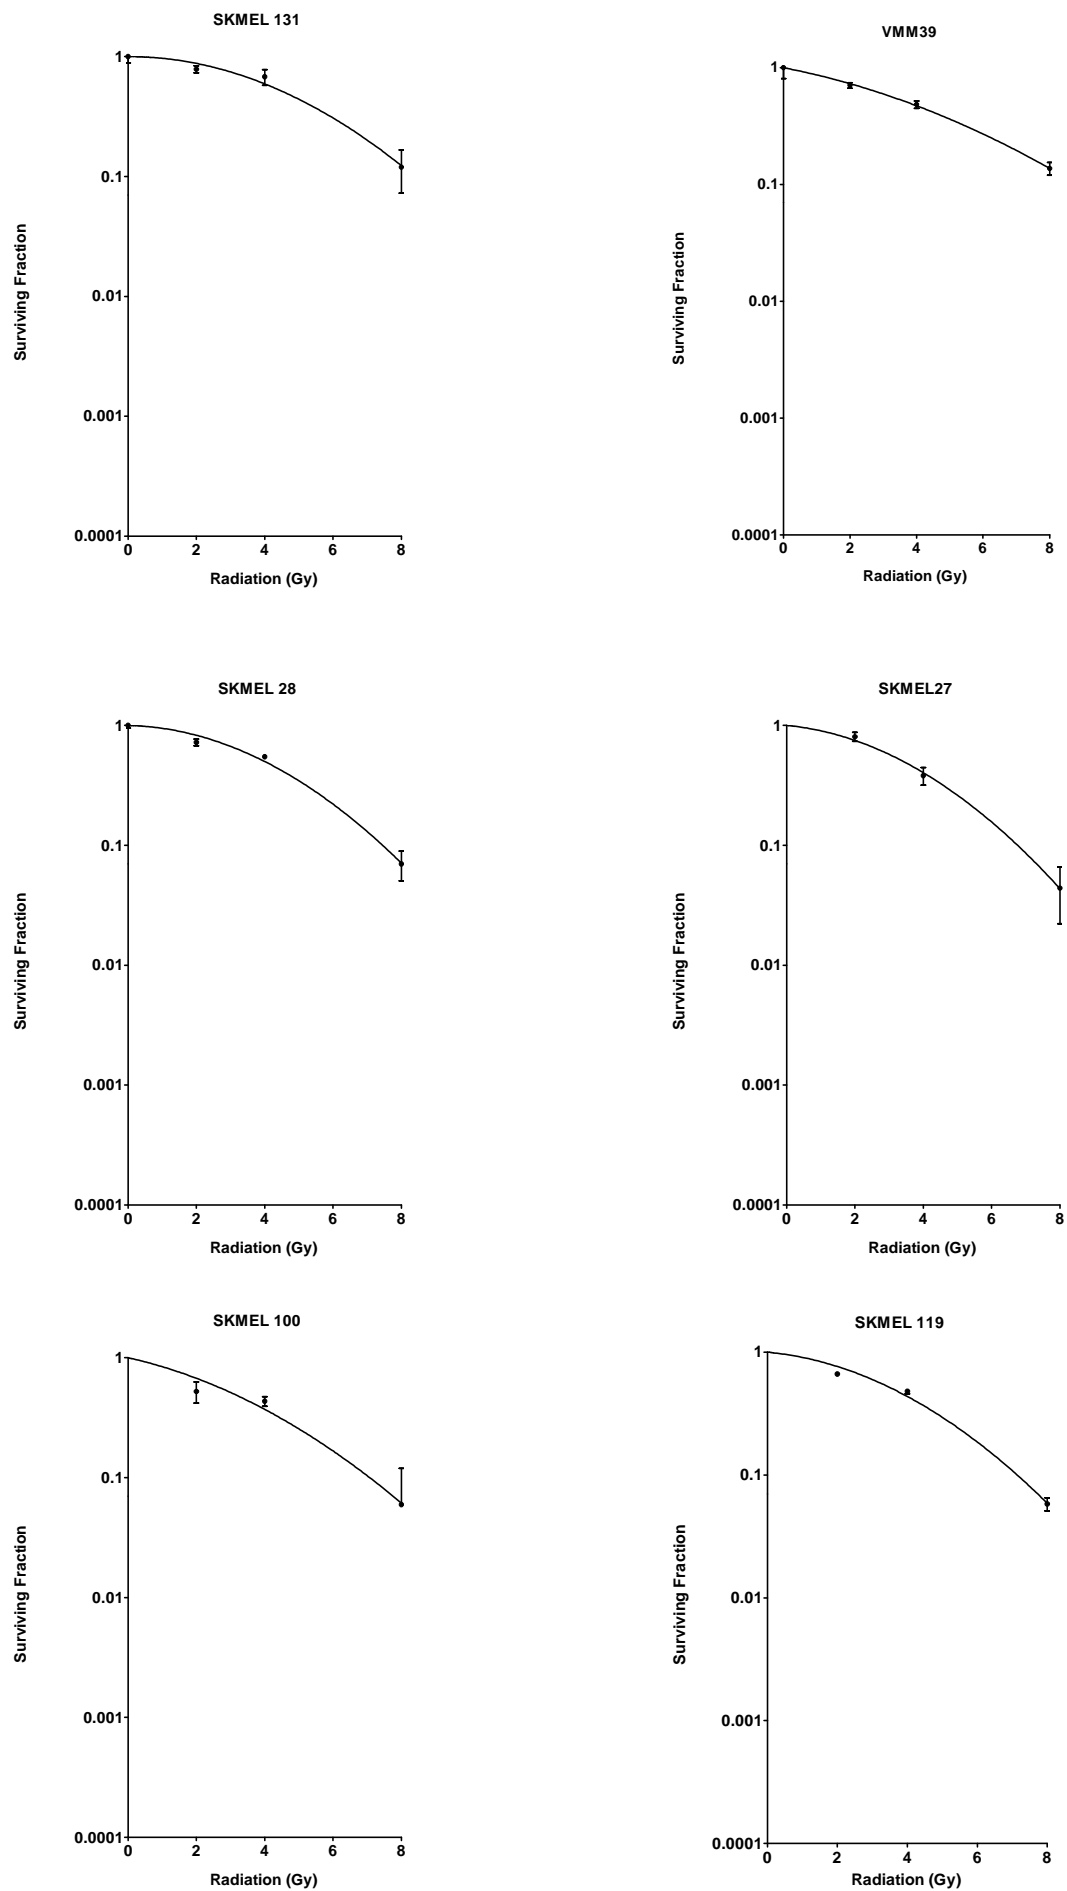

Supple. Fig.1: Survival Curves of Melanoma Cell Lines.

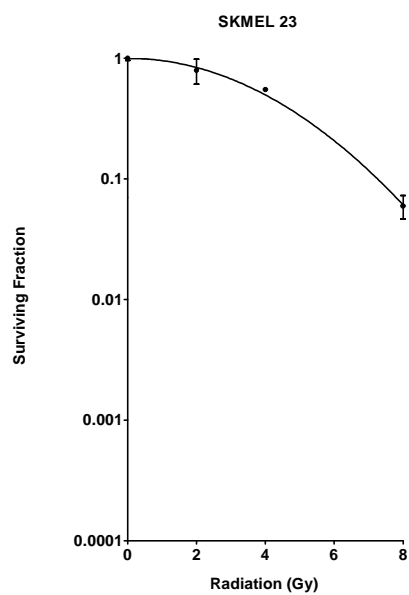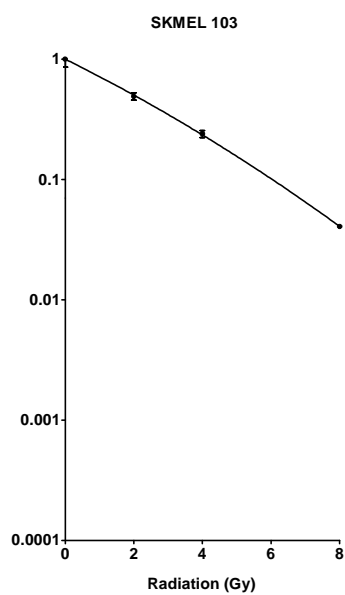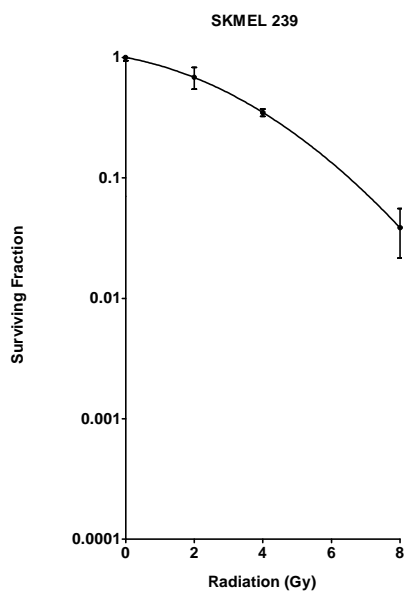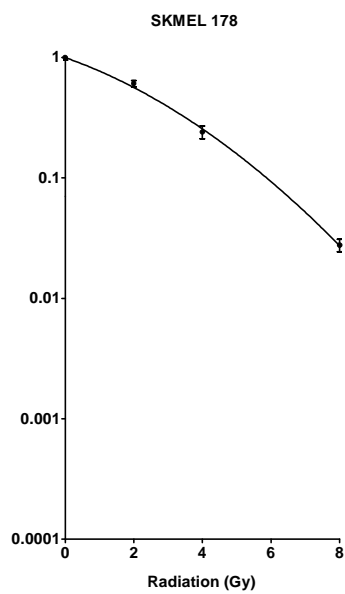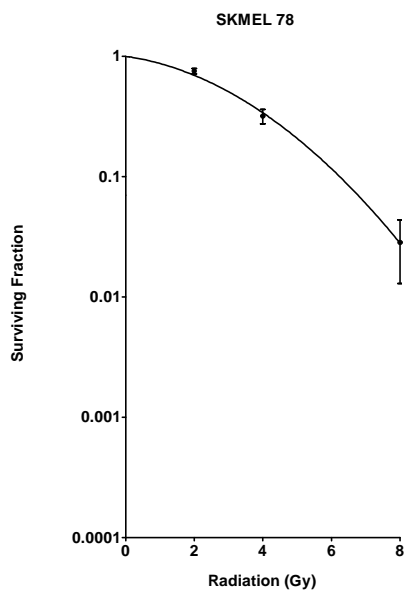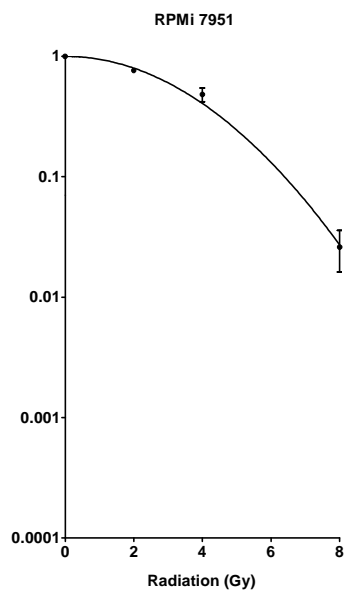

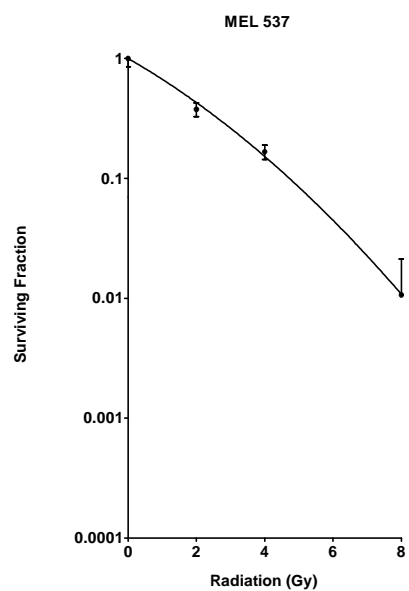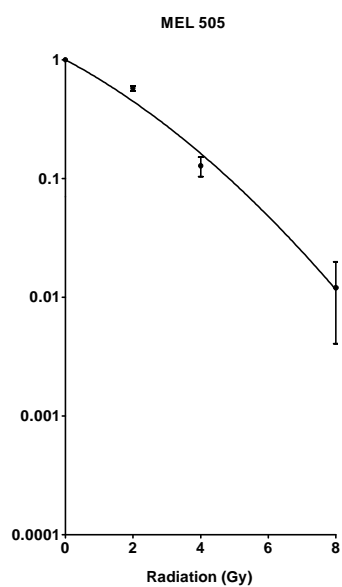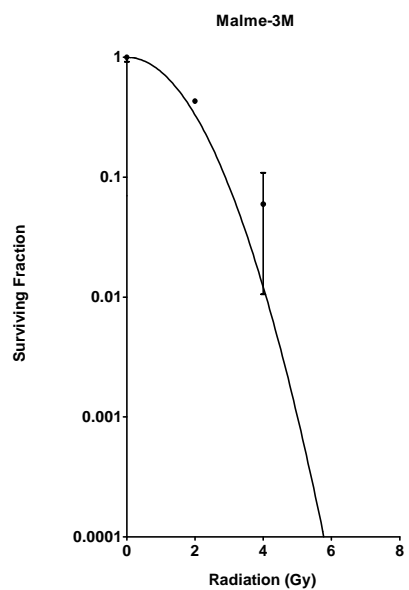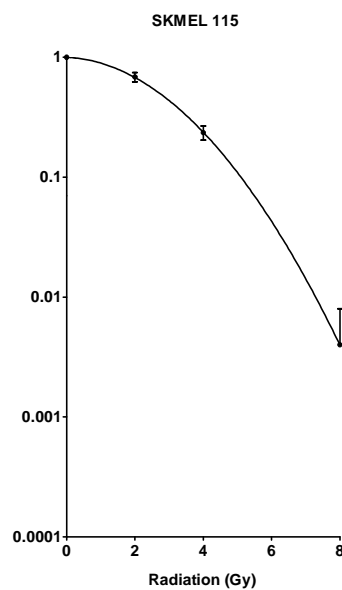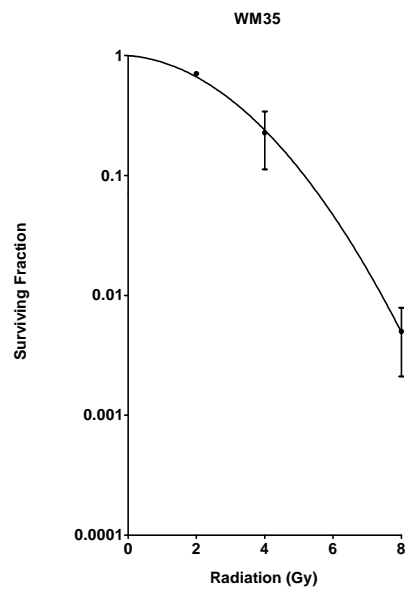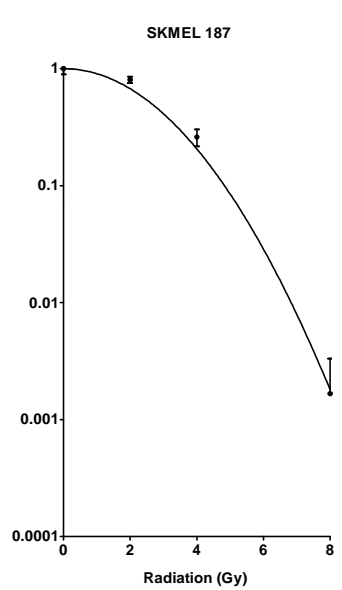

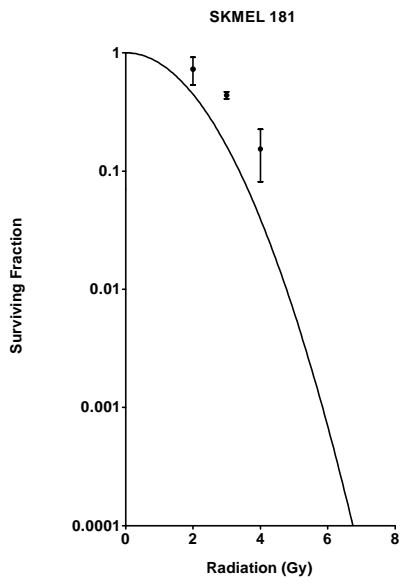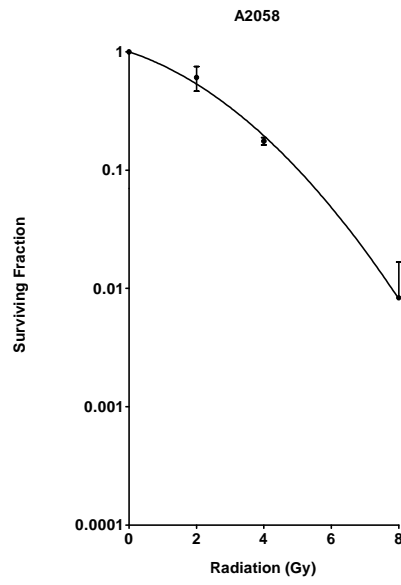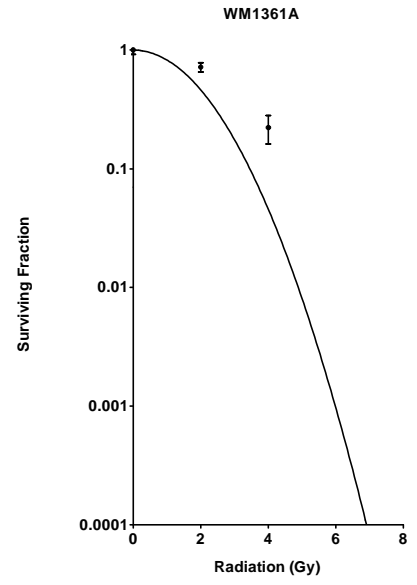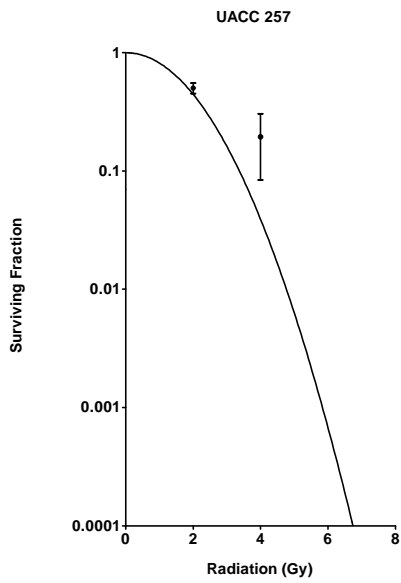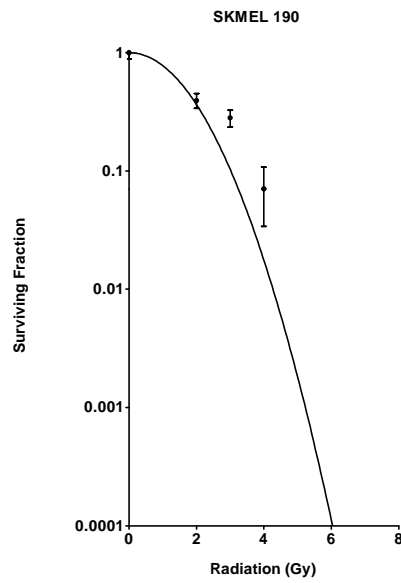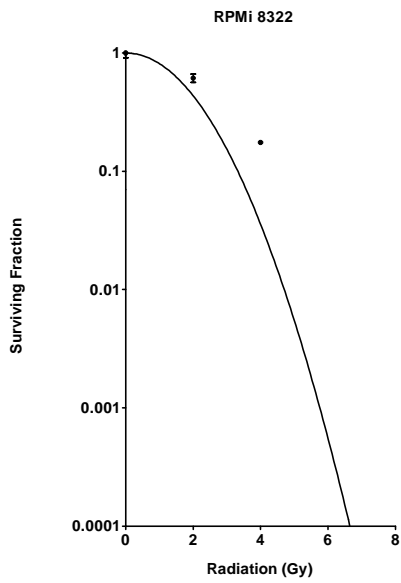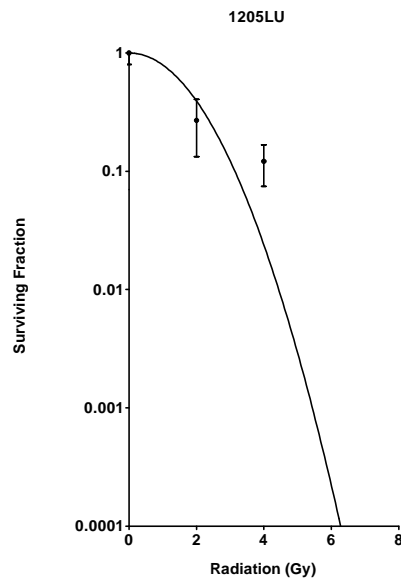

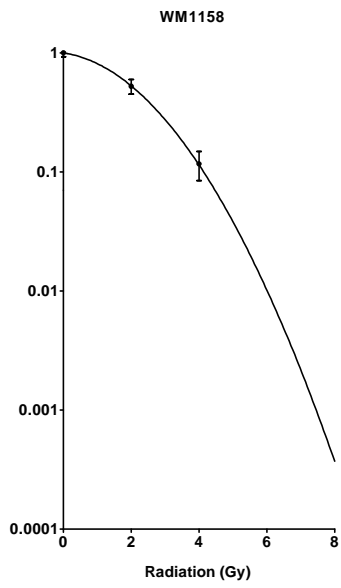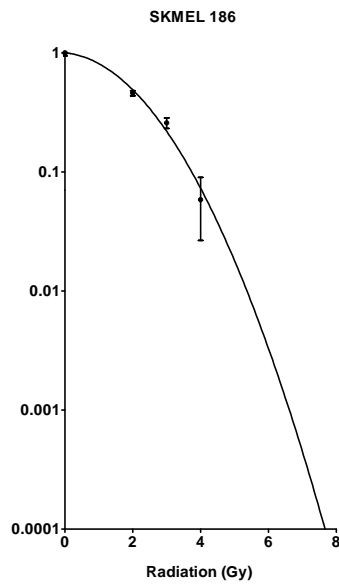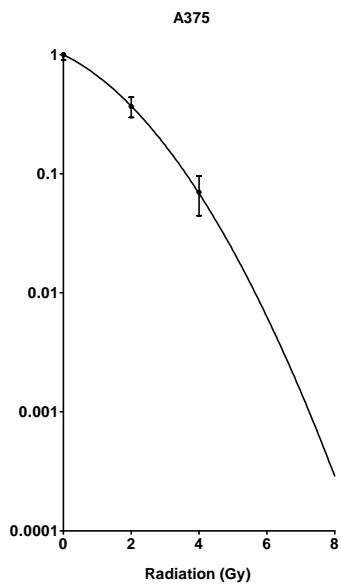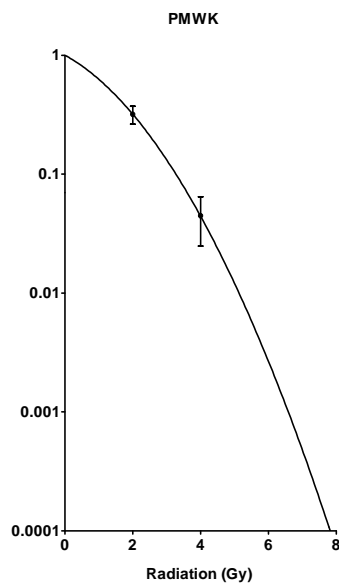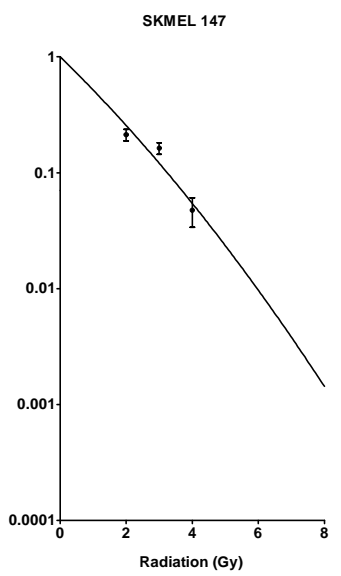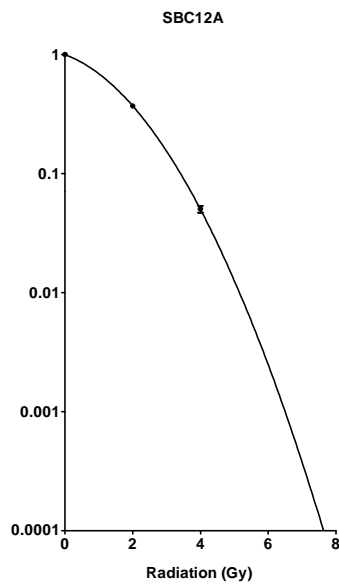

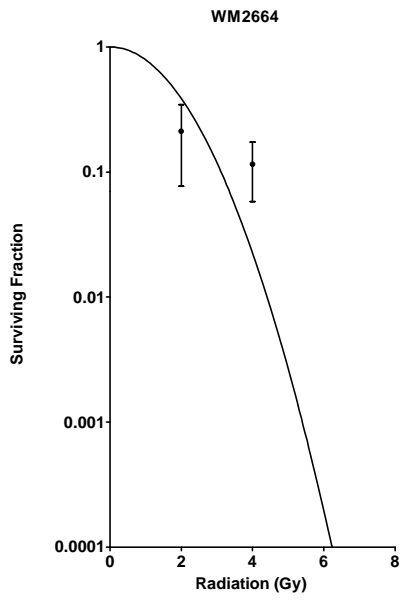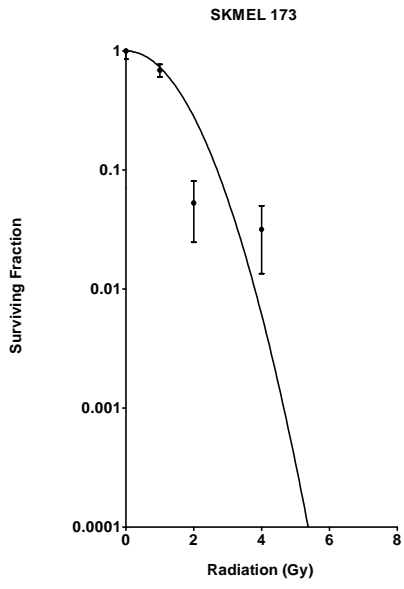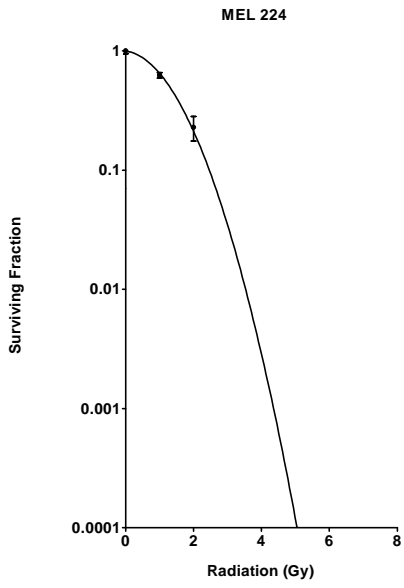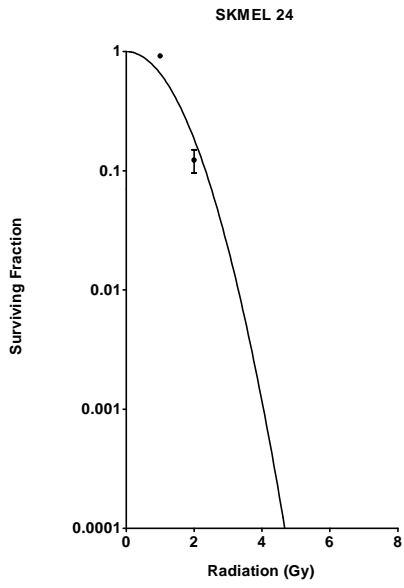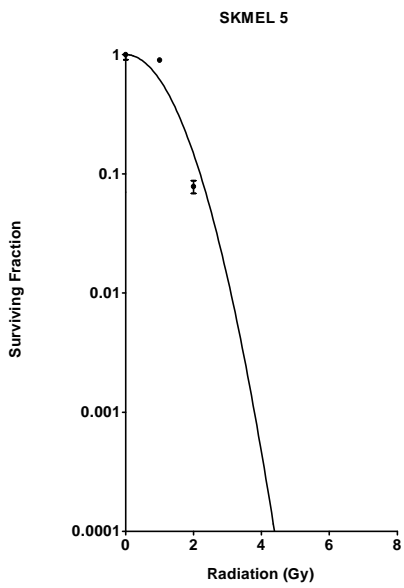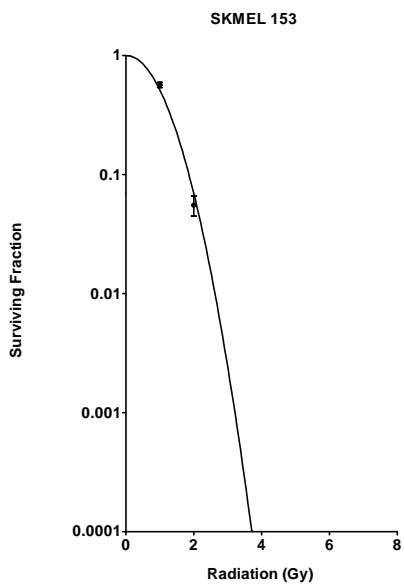

Supplement: NIHMS273374-supplement-02.pdf [file NIHMS273374-supplement-02.pdf]
